# Supplementary material for: Oral Antiviral Defense: Saliva- and Beverage-like Hypotonicity Dynamically Regulate Formation of Membraneless Biomolecular Condensates of Antiviral Human MxA in Oral Epithelial Cells
Source: MDPI journal article supplement (doi:10.3390/cells13070590), 2024-03-28
Supplement: s1 [file s1]

Supplementary Materials version 2

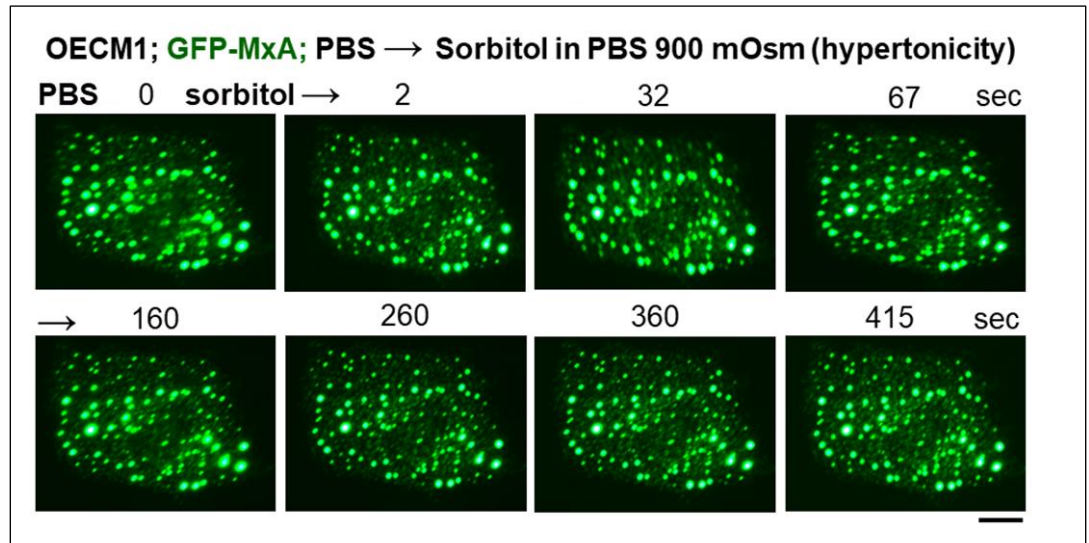

**Figure S1.** Lack of effect of hypertonicity (3x isotonicity) on GFP-MxA condensates in oral epithelial cells. A cell in an OECM1 culture expressing GFP-MxA condensates was first imaged in full culture medium and then shifted to culture medium supplemented with D-sorbitol (net tonicity: 900 mOsm). Live-cell imaging was carried out as indicated. Scale bar = 10  $\mu$ m.

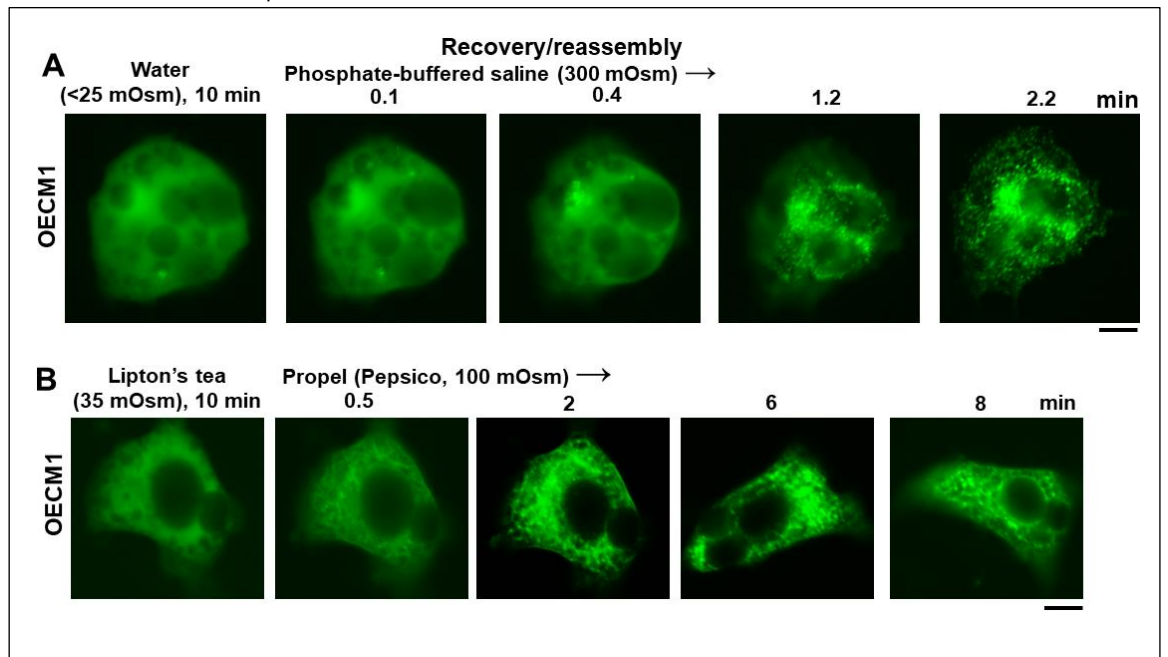

**Figure S2.** Panels A and B, Live-cell imaging of OECM1 cells expressing GFP-MxA condensates 2 days after transfection first observed in full culture medium, followed by exposure to water (<25 mOsm) or Lipton's tea (35 mOsm) for 10 min to disassemble the condensates. Imaging of the same cell was continued upon shifting the cultures to phosphate-buffered saline (300 mOsm) or Propel (Pepsico)(100 mOsm). Scale bar = 10  $\mu$ m

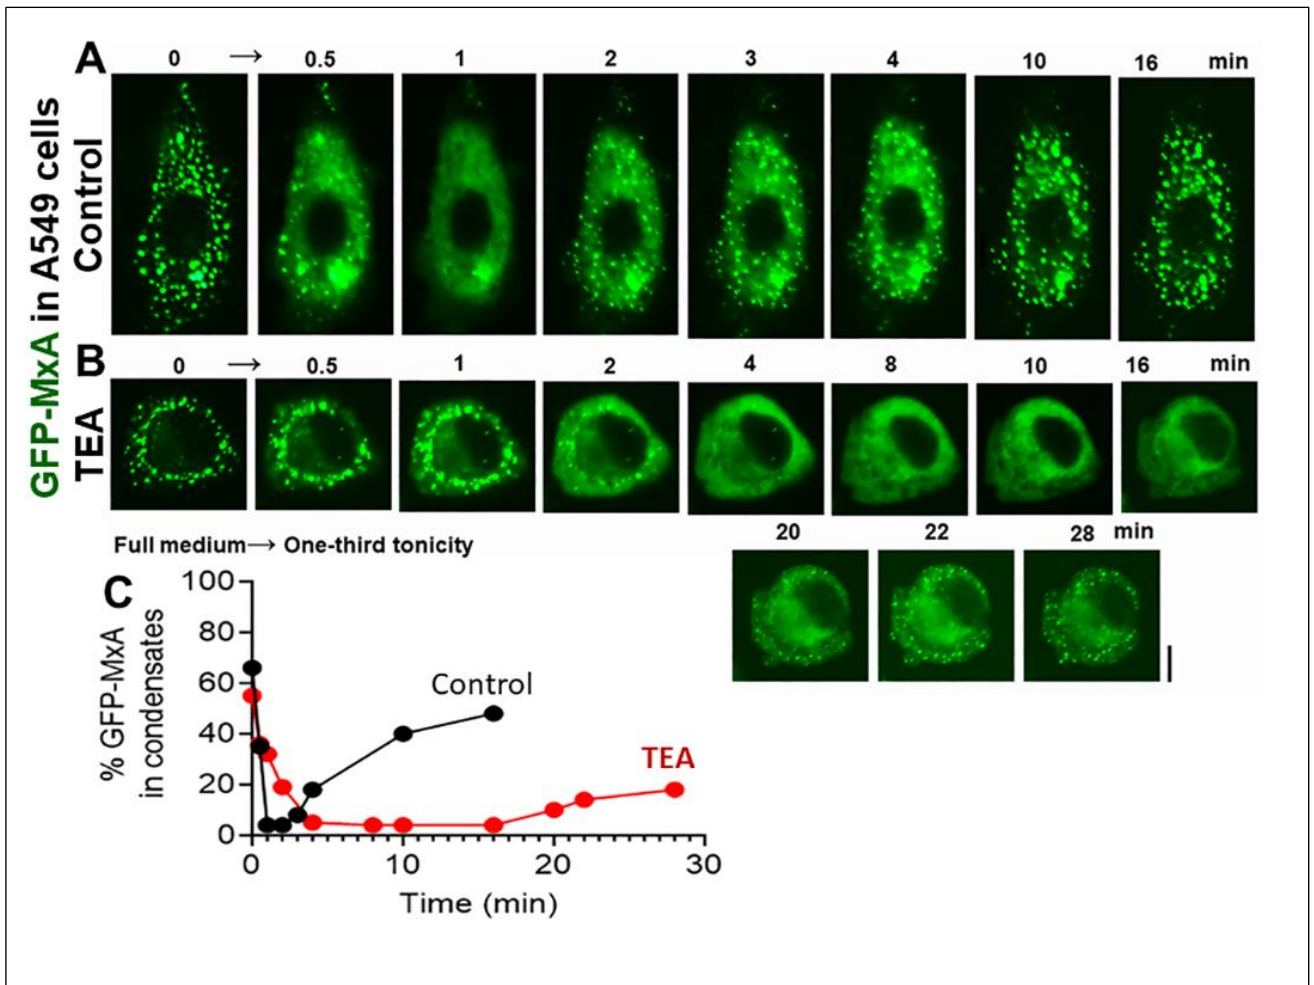

**Figure S3.** Testing a biochemical basis for hypotonicity sensing by GFP-MxA condensates in oral epithelial cells. Panels A and B, A549 cells were either kept in full culture medium or exposed to TEA (20 mM) in full culture medium for 20 min. Cultures were then shifted to one-third tonicity medium in the continued presence of TEA. Live-cell imaging was carried out as indicated. Scale bar = 10  $\mu$ m. Panel C, Quantitation of % GFP-MxA per cell in condensates (in the same cells shown in Panels A and B).
